# Supplementary material for: Frequency and Impact of Somatic Co-occurring Mutations on Post-Transplant Outcomes in Acute Myeloid Leukemia: A Multicenter Registry Analysis on Behalf of the EBMT ALWP
Source: Research Square preprint supplement (doi:10.21203/rs.3.rs-7375987/v1), 2025-09-02

**Frequency and Impact of Somatic Co-occurring Mutations on Post-Transplant Outcomes in Acute Myeloid Leukemia: A Multicenter Registry Analysis on Behalf of the EBMT ALWP**

**SUPPLEMENTARY MATERIAL**

**Supplementary Table 1.** Patient Characteristics of the whole cohort

| Variables | Modalities | N=952 | Normal  (N=416) | Abnormal (N=490) |
| --- | --- | --- | --- | --- |
| Year of HCT | median (range) | 2019 (2013-2023) | 2019 (2013-2023) | 2019 (2013-2023) |
| Age at HCT | median (range) | 55 (18-78) | 55 (18-78) | 54 (19-74) |
| Disease status | CR1 | 716 (76) | 325 (79) | 358 (74) |
| CR2 | 95 (10) | 49 (12) | 41 (9) |
| CR≥3 | 2 (0.2) | 1 (0.2) | 0 (0) |
| Active disease | 117 (12) | 32 (8) | 78 (16) |
| Other | 12 (1.3) | 6 (1.5) | 6 (1) |
| missing | 10 | 3 | 7 |
| Type of AML | de novo | 728 (77) | 334 (80) | 353 (72) |
| secAML | 224 (23) | 82 (20) | 137 (28) |
| ELN2022 cytogenetic classification | Favorable | 59 (7) |  | 59 (12) |
| Intermediate | 608 (68) |  | 192 (40) |
| Adverse | 226 (25) |  | 226 (48) |
| missing | 59 |  | 13 |
| KPS | < 90 | 146 (17) | 57 (14) | 81 (18) |
| ≥ 90 | 737 (83) | 337 (86) | 368 (82) |
| missing | 69 | 22 | 41 |
| Patient sex | Female | 485 (51) | 211 (51) | 252 (51) |
| Male | 467 (49) | 205 (49) | 238 (49) |
| Number of genes tested | median [IQR] | 40 [23-48] | 40 [23-48] | 39 [23-48] |
| (range) | (8-224) | (8-141) | (9-224) |
| Number of mutations | median [IQR] | 2 [1-4] | 3 [2-4] | 2 [1-3] |
| (range) | (0-14) | (0-10) | (0-14) |
| Number of mutations | 0 | 79 (8) | 26 (6) | 47 (10) |
| 1 | 184 (19) | 58 (14) | 121 (25) |
| 2 | 231 (24) | 89 (21) | 134 (28) |
| 3 | 191 (20) | 95 (23) | 88 (18) |
| [4,14] | 267 (28) | 148 (36) | 100 (20) |
| NPM1+FLT3-ITD | Negative:Negative | 632 (68) | 219 (53) | 391 (83) |
| Negative:Positive | 94 (10) | 46 (11) | 43 (9) |
| Positive:Negative | 95 (10) | 66 (16) | 22 (5) |
| Positive:Positive | 103 (11) | 82 (20) | 15 (3) |
| missing | 28 | 3 | 19 |
| NPM1 | Negative | 746 (79) | 266 (64) | 450 (92) |
| Positive | 201 (21) | 148 (36) | 38 (8) |
| missing | 5 | 2 | 2 |
| CEBPA | Negative | 677 (94) | 294 (90) | 352 (96) |
| Positive | 47 (6) | 31 (10) | 14 (4) |
| missing | 228 | 91 | 124 |
| FLT3-ITD | Negative | 731 (79) | 286 (69) | 415 (88) |
| Positive | 197 (21) | 128 (31) | 58 (12) |
| missing | 24 | 2 | 17 |
| FLT3 (TKD or other punctual mutation) | Negative | 749 (91) | 335 (90) | 375 (92) |
| Positive (835) | 48 (6) | 27 (7) | 21 (5) |
| Positive (other) | 23 (3) | 12 (3) | 11 (3) |
| missing | 132 | 42 | 83 |

**Abbreviations:** HCT:Hematopoietic cell transplantation; CR: Complete remission; AML: Acute myeloid leukemia; sec: secondary; ELN: European leukemiaNet; KPS: Karnofsky performance score; IQR: interquartile range.

**Supplementary Table 2. Patients’ Characteristics in the CR1 Cohort**

| **Variables** | **Modalities** | **All** | **CR1** |
| --- | --- | --- | --- |
| **N=952** | **N=716** |
| Year of HCT | median | 2019 | 2019 |
| (range) | (2013-2023) | (2013-2023) |
| Age at HCT | median | 55 | 55 |
| (range) | (18-78) | (19-75) |
| Number of genes tested | median [IQR] | 40 [23-48] | 40 [23-50] |
| (range) | (8-224) | (8-141) |
| Number of mutations | median [IQR] | 2 [1-4] | 2 [1-4] |
| (range) | (0-14) | (0-14) |
| Number of mutations | 0 | 79 (8) | 65 (9) |
| 1 | 184 (19) | 140 (20) |
| 2 | 231 (24) | 178 (25) |
| 3 | 191 (20) | 147 (21) |
| [4,15] | 267 (28) | 186 (26) |
| NPM1- FLT3-ITD | Negative:Negative | 632 (68) | 481 (69) |
| Negative:Positive | 94 (10) | 74 (11) |
| Positive:Negative | 95 (10) | 52 (8) |
| Positive:Positive | 103 (11) | 90 (13) |
| missing | 28 | 19 |
| Cytogenetic  ELN 2022 | Favorable | 59 (7) | 30 (5) |
| Intermediate | 608 (68) | 470 (70) |
| Adverse | 226 (25) | 173 (25) |
| missing | 59 | 43 |

**Supplementary Table 3.** Baseline Characteristics for *NPM1* mutation subgroup.

|  |  | ***NPM1*** | ***FLT3*-ITD negative** | ***FLT3*-ITD positive** |  |
| --- | --- | --- | --- | --- | --- |
| **Variables** | **Modalities** | **N=129*** | **N=48** | **N=79** | **Test** |
| Age at HCT | median (range) | 53 (20-75) | 54 (20-70) | 53 (20-75) | 0.25 |
| Year of HCT | Median (range | 2019  (2015-2022) | 2019  (2015-2022) | 2019  (2015-2022) | 0.37 |
| Months from diagnosis to HCT | median (range) | 5.1 (2.8-27) | 5.9 (3-27) | 5 (2.8-18) | 0.002 |
| MRD | Positive | 47 (43) | 22 (61) | 24 (33) | 0.006 |
| Negative | 62 (57) | 14 (39) | 48 (67) |  |
| missing | 20 | 12 | 7 |  |
| AML type | de novo | 111 (86) | 41 (86) | 69 (87) | 0.76 |
| Secondary AML | 18 (14) | 7 (14) | 10 (13) |  |
| Karyotype | Abnormal | 24 (19) | 11 (23) | 12 (15) | 0.51 f |
| Normal | 96 (74) | 34 (71) | 62 (79) |  |
| Not done/Failed | 9 (7) | 3 (6) | 5 (6) |  |
| Cytogenetic ELN 2022 | Favorable | 1 (1) | 0 (0) | 1 (1) | 1 f |
| Intermediate | 108 (92) | 40 (93) | 68 (92) |  |
| Adverse | 9 (7) | 3 (7) | 5 (7) |  |
| missing | 11 | 5 | 5 |  |
| Cytogenetic ELN 2022 | t(8;21) | 1 (1) | 0 (0) | 1 (1) | Not done |
| Normal | 96 (81) | 34 (79) | 62 (84) |  |
| Other intermediate | 12 (11) | 6 (14) | 6 (8) |  |
| Complex/mono | 5 (4) | 2 (5) | 3 (4) |  |
| mono(17)/abn(17p) +/- other | 1 (1) | 0 (0) | 0 (0) |  |
| mono(5)/mono(7)/del(5q) | 2 (2) | 1 (2) | 1 (1) |  |
| t(3q26)/t(9;22) | 1 (1) | 0 (0) | 1 (1) |  |
| missing | 11 | 5 | 5 |  |
| Number of genes in the NGS panel | median | 36 (8-78) | 26 (8-58) | 40 (12-73) | 0.07 |
| Number of mutations | median | 3 (1-10) | 3 (1-8) | 3 (1-10) | 0.93 |
| *DNMT3A* | Negative | 71 (55) | 26 (54) | 43 (54) | 0.98 |
| Positive | 58 (45) | 22 (46) | 36 (46) |  |
| *ASXL1* | Negative | 123 (95) | 44 (92) | 77 (98) | 0.2 f |
| Positive | 6 (5) | 4 (8) | 2 (2) |  |
| *RUNX1* | Negative | 126 (98) | 46 (98) | 78 (99) | 1 f |
| Positive | 2 (2) | 1 (2) | 1 (1) |  |
| missing | 1 | 1 | 0 |  |
| *SRSF2* | Negative | 118 (96) | 41 (91) | 75 (99) | 0.06 f |
| Positive | 5 (4) | 4 (9) | 1 (1) |  |
| missing | 6 | 3 | 3 |  |
| *IDH2* | Negative | 108 (84) | 39 (81) | 67 (85) | 0.6 |
| Positive | 21 (16) | 9 (19) | 12 (15) |  |
| *IDH1* | Negative | 112 (87) | 39 (81) | 72 (91) | 0.1 |
| Positive | 17 (13) | 9 (19) | 7 (9) |  |
| *TET2* | Negative | 104 (82) | 36 (78) | 67 (85) | 0.35 |
| Positive | 23 (18) | 10 (22) | 12 (15) |  |
| missing | 2 | 2 | 0 |  |
| *NRAS* | Negative | 112 (90) | 38 (84) | 72 (93) | 0.12 f |
| Positive | 12 (10) | 7 (16) | 5 (7) |  |
| missing | 5 | 3 | 2 |  |

**Abbreviations:** HCT: Hematopoietic cell transplantation; MRD: measurable residual disease; AML: Acute myeloid leukemia; ELN: European LeukemiaNet; mono: monosomy; NGS: next-generation sequencing. *2 missing *FLT3*-ITD data

**Supplementary Table 4.** Univariate Analysis for *NPM1* mutation subgroup

| **Variable** | **Modalities** | **2y OS** | **2y LFS** | **2y RI** | **2y NRM** |
| --- | --- | --- | --- | --- | --- |
| MRD | Negative | 84 [72-92] | 79 [66-88] | 12 [5-22] | 9 [3-18] |
| Positive | 75 [60-86] | 67 [51-79] | 23 [12-36] | 11 [4-22] |
| Missing N (%) | 20 (16%) | 20 (16%) | 20 (16%) | 20 (16%) |
| P value | 0.27 | 0.11 | 0.2 | 0.42 |
| ELN 2022 cytogenetics | Fav/Int/miss | 81 [73-87] | 74 [64-81] | 18 [11-25] | 9 [4-15] |
| Adverse | 89 [43-98] | 78 [37-94] | 11 [0.5-41] | 11 [0.5-41] |
| P value | 0.51 | 0.29 | 0.63 | 0.03 |
| *FLT3*-ITD | Negative | 82 [67-91] | 78.2 [63-88] | 13 [5-25] | 9 [3-19] |
| Positive | 81 [71-88] | 70.5 [59-80] | 20 [12-30] | 9 [4-17] |
| Missing N (%) | 2 (2%) | 2 (2%) | 2 (2%) | 2 (2%) |
| P value | 0.41 | 0.71 | 0.73 | 0.26 |

Abbreviations: OS: overall survival; LFS: Leukemia-free survival; RI: relapsed incidence; NRM: non-relapse mortality; MRD: measurable residual disease; ELN: European LeukemiaNet; Fav: Favorable; Int: Intermediate

**Supplementary Table 5.** Baseline Characteristics for SAR mutations group

|  |  | **N=189** | **SAR** | **SAR + FLT3ITD-DNMT3A** | **SAR + NPM1** | **SAR + TP53** | **P** |
| --- | --- | --- | --- | --- | --- | --- | --- |
| **Variables** | **Modalities** | **132** | **39** | **12** | **6** |  |
| Age at HCT | median | 59.7 | 59.2 | 61.4 | 57 | 60.7 | 0.27 |
| (range) | (20-74) | (20-74) | (27-73) | (20-70) | (47-69) |  |
| Year of HCT | median | 2019 | 2019 | 2020 | 2019 | 2020 | 0.61 |
| (range) | (2015-23) | (2015-23) | (2015-23) | (2016-22) | (2018-21) |  |
| MRD | Positive | 28 (28) | 19 (30) | 6 (25) | 3 (33) | 0 (0) | 0.75 |
| missing | 89 | 69 | 15 | 3 | 2 |  |
| Time from diag to HSCT | median – mo. | 4.6 | 4.4 | 5.3 | 6 | 4.9 | 0.07 |
| (range) | (1-23) | (2-23) | (1-9) | (3-15) | (3-6) |  |
| AML type | de novo | 132 (70) | 85 (64) | 34 (87) | 10 (83) | 3 (50) | 0.01 |
| secAML | 57 (30) | 47 (36) | 5 (13) | 2 (17) | 3 (50) |  |
| Chromosome analysis | Abnormal | 94 (50) | 71 (54) | 15 (39) | 3 (25) | 5 (83) | Not done |
| Normal | 88 (47) | 56 (42) | 23 (59) | 8 (67) | 1 (17) |  |
| Not done/Failed | 7 (3.7) | 5 (3.8) | 1 (2.6) | 1 (8.3) | 0 (0) |  |
| Cytogenetic ELN2022 | Favorable | 7 (4) | 6 (5) | 1 (3) | 0 (0) | 0 (0) | 0.46 |
| Intermediate | 131 (73) | 88 (70) | 31 (84) | 9 (82) | 3 (50) |  |
| Adverse | 41 (23) | 31 (25) | 5 (14) | 2 (18) | 3 (50) |  |
| missing | 10 | 7 | 2 | 1 | 0 |  |
| Patient sex | Male | 108 (57) | 77 (58) | 22 (56) | 8 (67) | 1 (17) |  |
| Donor type | MSD | 69 (37) | 44 (34) | 17 (43) | 5 (42) | 3 (50) | Not done |
| Haplo | 37 (20) | 27 (21) | 8 (21) | 2 (17) | 0 (0) |  |
| MUD | 63 (34) | 46 (35) | 11 (28) | 4 (33) | 2 (33) |  |
| Others | 19 (11) | 14 (11) | 3 (8) | 1 (8) | 1 (17) |  |
| missing | 1 | 1 | 0 | 0 | 0 |  |
| Source of cells | PB | 180 (95) | 129 (98) | 36 (92) | 9 (75) | 6 (100) | Not done |
| BM | 8 (5) | 2 (1) | 3 (8) | 3 (25) | 0 (0) |  |
| Others | 1 (0.5) | 1 (1) | 0 (0) | 0 (0) | 0 (0) |  |
| Myeloablative regimen | Yes | 69 (37) | 51 (39) | 14 (36) | 3 (25) | 1 (17) |  |

**Abbreviations:** HCT: Hematopoietic cell transplantation; mo.: months; MRD: measurable residual disease; AML: Acute myeloid leukemia; sec: secondary; ELN: European LeukemiaNet; MSD: Matched sibling donor; Haplo: haploidentical donor; MUD; matched unrelated donor; PB: peripheral blood; BM: bone marrow.

**Supplementary Table 6.** Univariate analysis for the SAR mutations subgroup

| **Variable** | **Modalities** | **2y OS** | **2y LFS** | **2y RI** | **2y NRM** |
| --- | --- | --- | --- | --- | --- |
| MRD | Positive | 80 [58-91] | 73 [52-86] | 23 [9-41] | 4 [0.2-16] |
| Negative | 76 [64-84] | 68 [56-78] | 20 [11-31] | 12 [5-21] |
| Missing N (%) | 89 (47) | 89 (47) | 89 (47) | 89 (47) |
| P value | 0.542 | 0.773 | 0.527 | 0.198 |
| ELN 2022  cytogenetics | Fav/Int/miss | 77 [69-84] | 70 [62-77] | 17 [11-24] | 13 [8-20] |
| Adverse | 82 [65-91] | 65 [48-77] | 23 [11-37] | 13 [4.5-25] |
| P value | 0.7 | 0.22 | 0.54 | 0.39 |
| No. of SAR involved | 1 | 79 [71-85] | 70 [62-77] | 18 [12-25] | 12 [7-18] |
| 2 or 3 | 77 [62-87] | 67 [50-79] | 18 [8-31] | 16 [7-28] |
| Missing N (%) | 4 (2) | 4 (2) | 4 (2) | 4 (2) |
| P value | 0.99 | 0.72 | 0.99 | 0.65 |

**Abbreviations:** OS: overall survival; LFS: Leukemia-free survival; RI: relapsed incidence; NRM: non-relapse mortality; MRD: measurable residual disease; ELN: European LeukemiaNet; Fav: Favorable; Int: Intermediate; SAR: *SRSF2/ASXL1/RUNX1*

**Supplementary Table 7.** Baseline Characteristics for TP53 mutation subgroup

|  |  | ***TP53*** |
| --- | --- | --- |
| **Variables** | **Modalities** | **47** |
| Age at HCT | median (range) | 60 (22-72) |
| Year of HCT | median (range) | 2020 (2015-2022) |
| Months diagnosis to HCT | median(range) | 5 (3-17) |
| TP53 No. of mutations | 1 | 39 (83) |
| 2 | 8 (17) |
| VAF | median (range) | 45.5 (3-93) |
| missing | 5 |
| MRD | Positive | 7 (30) |
| Negative | 16 (70) |
| missing | 24 |
| AML type | de novo | 23 (49) |
| Secondary AML | 24 (51) |
| Karyotype | Abnormal | 37 (79) |
| Normal | 8 (17) |
| Not done/Failed | 2 (4) |
| Cytogenetic ELN2022 | Favorable | 0 (0) |
| Intermediate | 16 (36) |
| Adverse | 29 (64) |
| missing | 2 |
| Number of mutations | median (range) | 2 (1-12) |
| Number of mutations | 0 |  |
| 1 | 12 (25) |
| 2 | 17 (36) |
| 3 | 7 (15) |
| [4,12] | 11 (24) |
| *NPM1* | Negative | 43 (92) |
| Positive | 4 (8) |
| *FLT3-*ITD | Negative | 39 (87) |
| Positive | 6 (13) |
| missing | 2 |
| *NPM1*  *FLT3*-ITD | Negative: Negative | 38 (84) |
| Negative: Positive | 3 (7) |
| Positive: Negative | 1 (2) |
| Positive: Positive | 3 (7) |
| Missing | **2** |
| *DNMT3A* | Negative | 35 (75) |
| Positive | 12 (25) |
| *ASXL1* | Negative | 45 (96) |
| Positive | 2 (4) |
| *RUNX1* | Negative | 43 (92) |
| Positive | 4 (8) |
| missing | 0 |

**Abbreviations:** HCT: Hematopoietic cell transplantation; VAF: Variant allele frequency; MRD: measurable residual disease; AML: Acute myeloid leukemia; ELN: European LeukemiaNet

**Supplementary Table 8.** Univariate analysis for *TP53* mutation subgroup

| **Variable** | **Modalities** | **2y OS** | **2y LFS** | **2y RI** | **2y NRM** |
| --- | --- | --- | --- | --- | --- |
| Type of AML | de novo | 60 [37-77] | 39 [20-58] | 39 [19-59] | 22 [8-41] |
| secAML | 34 [16-54] | 31 [13- 50] | 44 [22-63] | 26 [10-45] |
| P value | 0.31 | 0.39 | 0.74 | 0.7 |
| ELN 2022 cytogenetics | Intermediate | 61 [33-81] | 49 [24-71] | 31 [11-55] | 20 [4-43] |
| Adverse | 34 [18-52] | 22 [9-39] | 50 [30-67] | 28 [13-45] |
| Missing N (%) | 2 (4) | 2 (4) | 2 (4) | 2 (4) |
| P value | 0.03 | 0.03 | 0.16 | 0.46 |
| VAF | (2,45) | 52 [29-70] | 47 [25-66] | 24 [8-44] | 29 [11-50] |
| (45,94) | 36 [16-56] | 21 [7-40] | 55 [30-74] | 25 [8-45] |
| Missing N (%) | 5 (11) | 5 (11) | 5 (11) | 5 (11) |
| P value | 0.11 | 0.08 | 0.02 | 0.68 |

**Abbreviations:** OS: overall survival; LFS: Leukemia-free survival; RI: relapsed incidence; NRM: non-relapse mortality; AML: acute myeloid leukemia; sec: secondary; ELN: European LeukemiaNet; VAF: Variant allele frequency.

**Supplementary Table 9.** Baseline characteristics of the decuple negative subgroup

|  |  | **Decuple negative** |
| --- | --- | --- |
| **Variables** | **Modalities** | **167** |
| Age at HCT | median | 47 (19-75) |
| Year of HCT | median (range) | 2019 (2013-2023) |
| Months diagnosis to HCT | median (range) | 4.5 (2-23) |
| MRD | Positive | 26 (35) |
| Negative | 48 (65) |
| missing | 93 |
| AML type | de novo | 125 (75) |
| Secondary AML | 42 (25) |
| Karyotype | Abnormal | 110 (66) |
| Normal | 52 (31) |
| Not done/Failed | 5 (3) |
| Cytogenetic ELN 2022 | Favorable | 17 (11) |
| Intermediate | 84 (53) |
| Adverse | 58 (36) |
| missing | 8 |
| Number of mutations | median (range) | 1 (0-7) |
| Number of mutations | 0 | 52 (31) |
| 1 | 44 (26) |
| 2 | 48 (29) |
| 3 | 12 (7) |
| [4,12] | 11 (7) |
| *NRAS* | Negative | 143 (86) |
| Positive | 24 (14) |
| *KRAS* | Negative | 109 (83) |
| Positive | 23 (17) |
| missing | 35 |
| *WT1* | Negative | 118 (90) |
| Positive | 13 (10) |
| missing | 36 |
| *CEBPA* | Negative | 116 (89) |
| Positive | 14 (11) |
| missing | 37 |
| missing | 13 |
| *KIT* | Negative | 133 (92) |
| Positive | 12 (8) |
| missing | 22 |
| *PTPN11* | Negative | 120 (92) |
| Positive | 11 (8) |
| missing | 36 |

**Abbreviations:** HCT: Hematopoietic cell transplantation; MRD: measurable residual disease; AML: Acute myeloid leukemia; ELN: European LeukemiaNet;

**Supplementary Table 10.** Univariate analysis for the decuple negative subgroup

| **Variable** | **Modalities** | **2y OS** | **2y LFS** | **2y RI** | **2y NRM** |
| --- | --- | --- | --- | --- | --- |
| ELN2022 cytogenetics | Favorable | 77 [49-90] | 70 [42-86] | 12 [2-33] | 18 [4-39] |
| Intermediate | 72 [61-81] | 66 [55-75] | 18 [10-27] | 16 [9-25] |
| Adverse | 58 [43-70] | 52 [38-65] | 35 [22-49] | 13 [6-23] |
| Missing N (%) | 8 (5%) | 8 (5%) | 8 (5%) | 8 (5%) |
| P value | 0.06 | 0.17 | 0.02 | 0.31 |
| Type of AML | de novo | 64 [54-72] | 56 [46-64] | 28 [20-36] | 17 [11-24] |
| Secondary AML | 78 [61-89] | 77 [60-87] | 11 [3-23] | 12 [4-24] |
| P value | 0.02 | 0.03 | 0.048 | 0.43 |
| MRD | Negative | 71 [55-82] | 57 [41-70] | 25 [13-39] | 18 [8-30] |
| Positive | 55 [33-72] | 48 [28-66] | 36 [18-55] | 16 [5-33] |
| Missing N (%) | 93 (56%) | 93 (56%) | 93 (56%) | 93 (56%) |
| P value | 0.8 | 0.55 | 0.53 | 0.95 |
| Age at HCT (by quartile) | (18,35] | 67 [49-80] | 58 [40-72] | 38 [22-53] | 5 [1-15] |
| (35,46] | 62 [43-76] | 59 [41-74] | 27 [13-42] | 14 [5-28] |
| (46,58] | 64 [48-76] | 60 [44-72] | 14 [5-25] | 27 [15-41] |
| (58,76] | 77 [60-87] | 66 [49-79] | 19 [8-33] | 15 [6-29] |
| P value | 0.53 | 0.93 | 0.17 | 0.02 |

**Abbreviations:** OS: overall survival; LFS: Leukemia-free survival; RI: relapsed incidence; NRM: non-relapse mortality; ELN: European LeukemiaNet; AML: acute myeloid leukemia; MRD: measurable residual disease; HCT: hematopoietic cell transplantation.

**Supplementary Figure 1. Frequency of somatic mutations in the subset of 716 AML patients who underwent allo-HCT in first complete remission (CR1).**


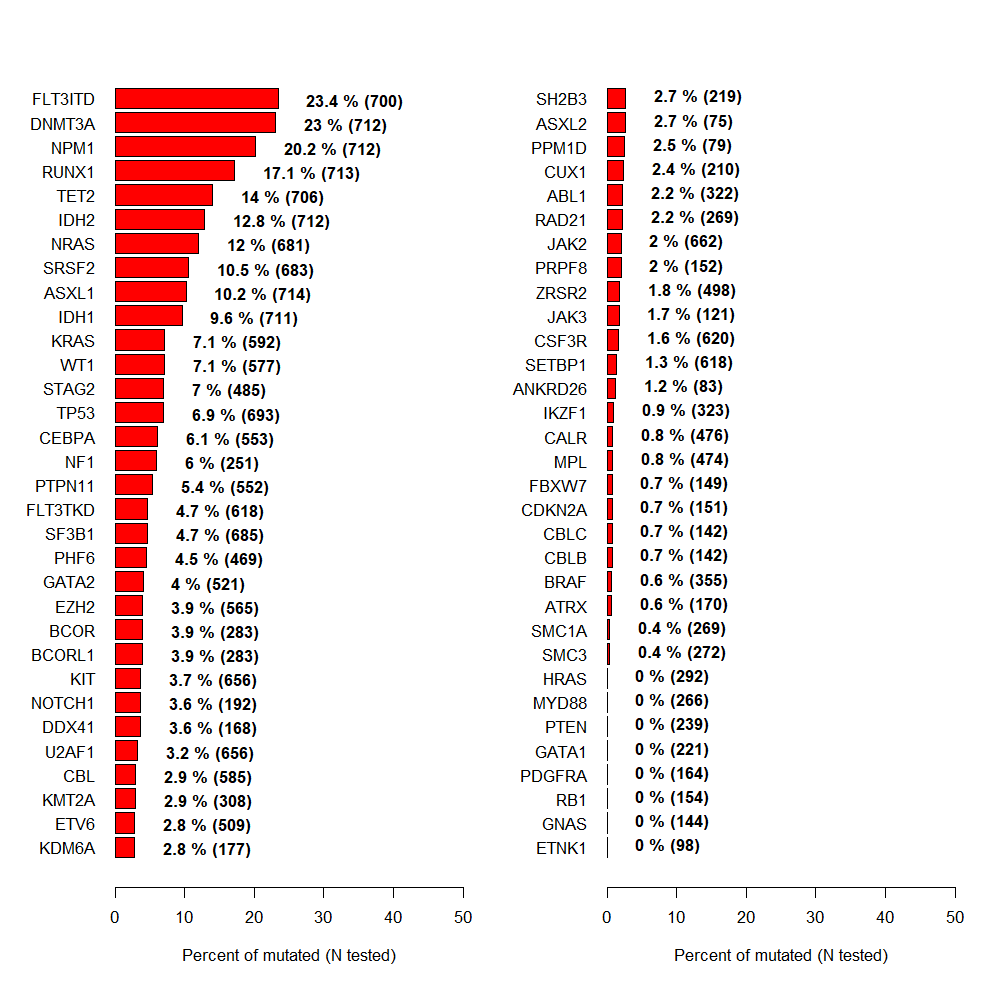

Supplement: Supplementary file 1 [file 8d4510c1e8dec77adc8ac2e4.docx]
